# Supplementary material for: Covalent Organic Framework/Polyacrylonitrile Electrospun Nanofiber for Dispersive Solid-Phase Extraction of Trace Quinolones in Food Samples
Source: MDPI journal article supplement (doi:10.3390/nano12142482), 2022-07-20
Supplement: s1 [file s1]

## Supplementary Material

# Covalent Organic Framework/Polyacrylonitrile Electrospun Nanofiber for Dispersive Solid-Phase Extraction of Trace Quinolones in Food Samples

Jinghui Zhou <sup>1</sup>, An Chen <sup>1</sup>, Hongying Guo <sup>1</sup>, Yijun Li <sup>1,2</sup>, Xiwen He <sup>1</sup>, Langxing Chen <sup>1,\*</sup> and Yukui Zhang <sup>1,3</sup>

- <sup>1</sup> College of Chemistry, Tianjin Key Laboratory of Biosensing and Molecular Recognition, Nankai University, Tianjin 300071, China; 2120200750@mail.nankai.edu.cn (J.Z.); 1120180234@mail.nankai.edu.cn (A.C.); 1120190301@mail.nankai.edu.cn (H.G.); yijunli@nankai.edu.cn (Y.L.); xiwenhe@nankai.edu.cn (X.H.); ykzhang@dicp.ac.cn (Y.Z.)
- <sup>2</sup> National Demonstration Center for Experimental Chemistry Education, Nankai University, Tianjin 300071, China
- <sup>3</sup> Dalian Institute of Chemical Physics, Chinese Academy of Sciences, Dalian 116023, China
- \* Correspondence: lxchen@nankai.edu.cn

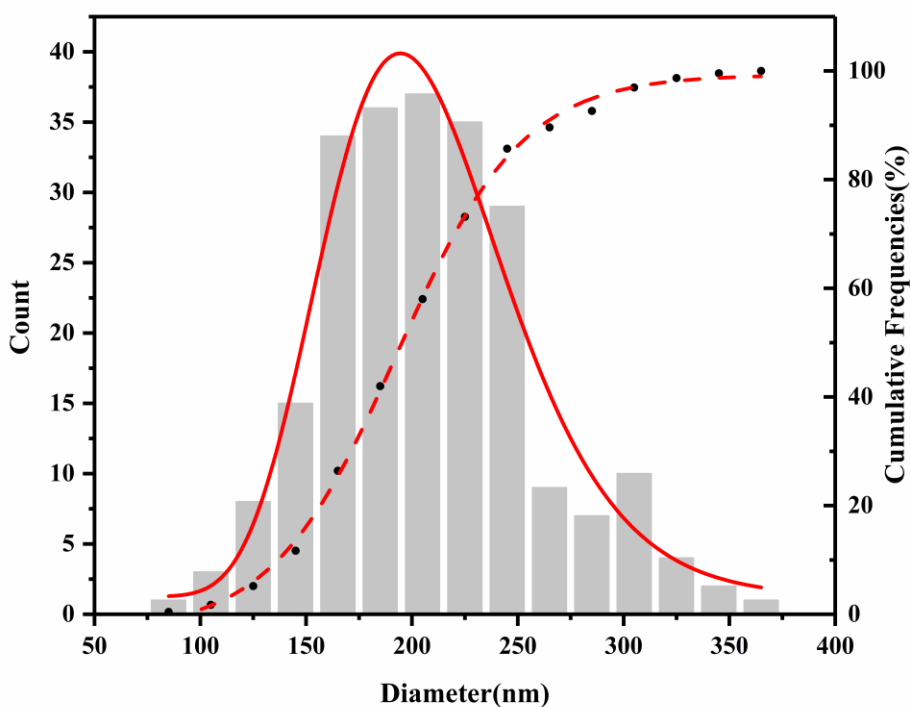

Figure S1. Size distribution and cumulative frequencies diagram of PAN nanofiber.

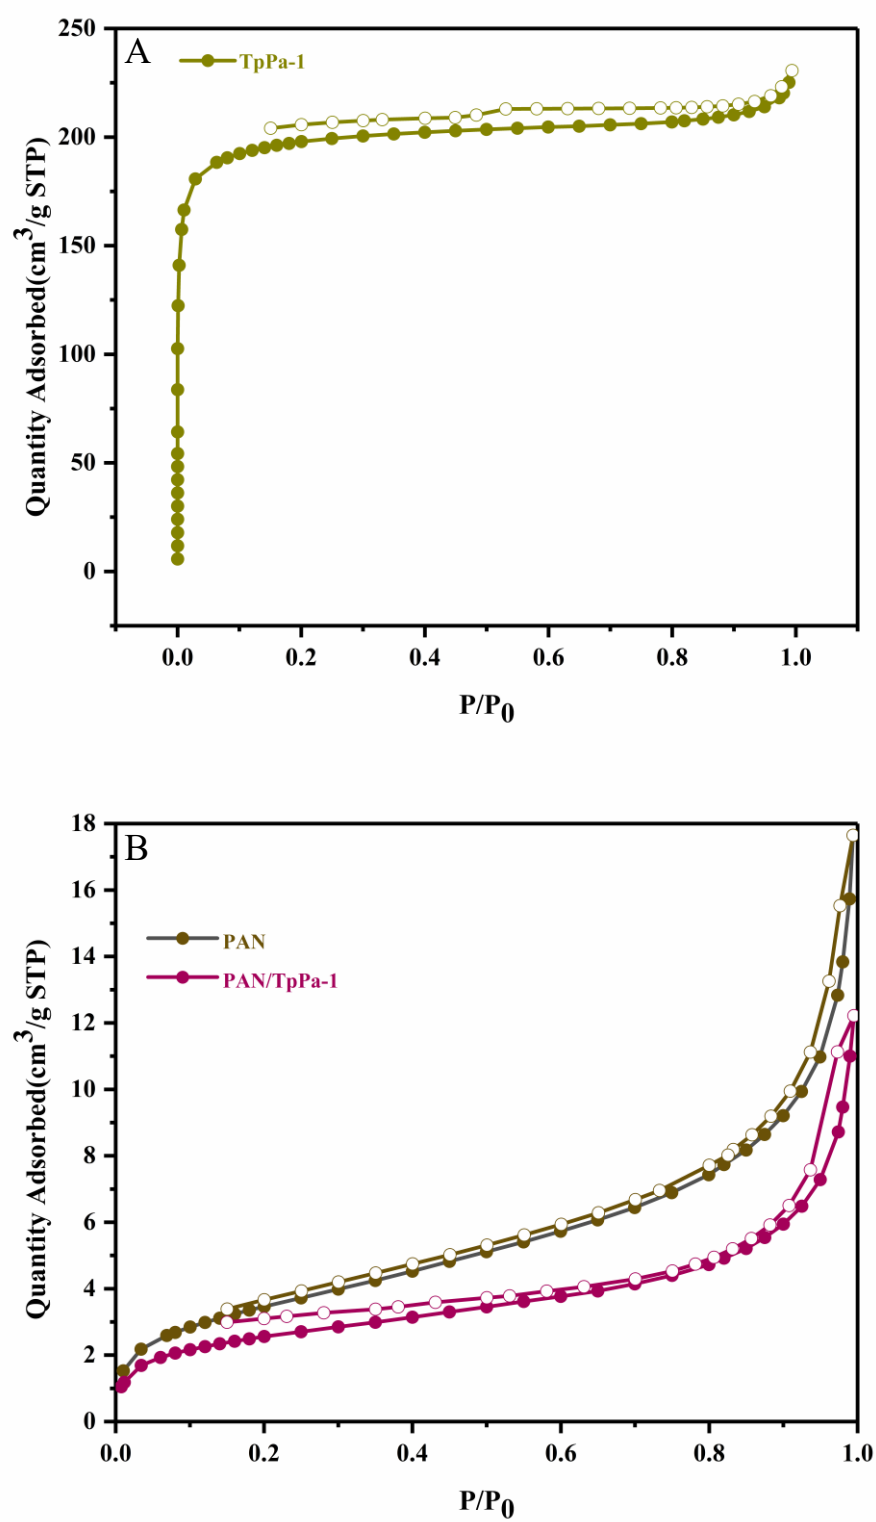

**Figure S2.** N<sub>2</sub> adsorption-desorption isotherm of TpPa-1 (A); PAN, PAN/TpPa-1 (B).

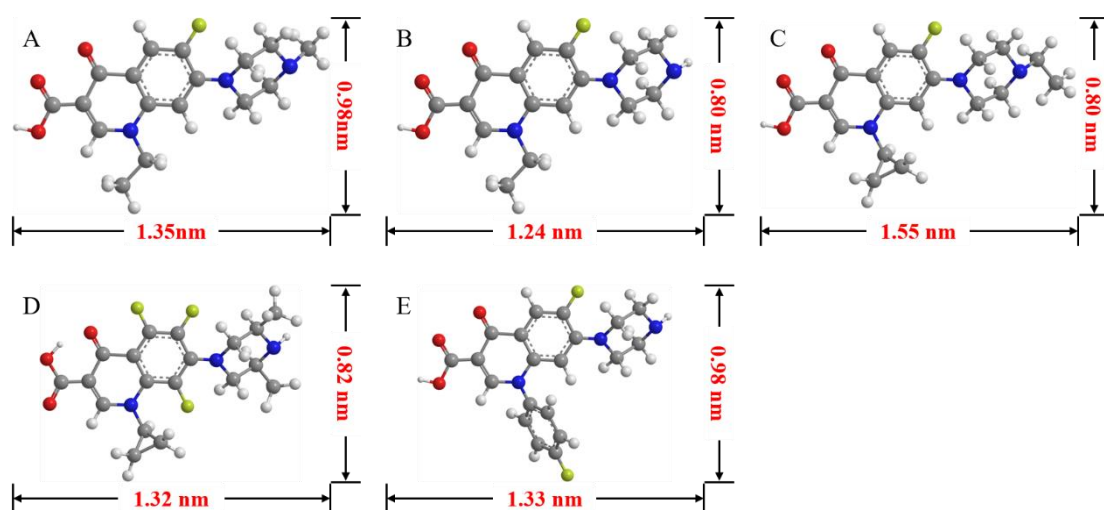

**Figure S3.** The molecular sizes of five quinolones PEF (A), NOR (B), ENR (C), ORB (D) and SAR (E) are illustrated by Gaussian simulation.

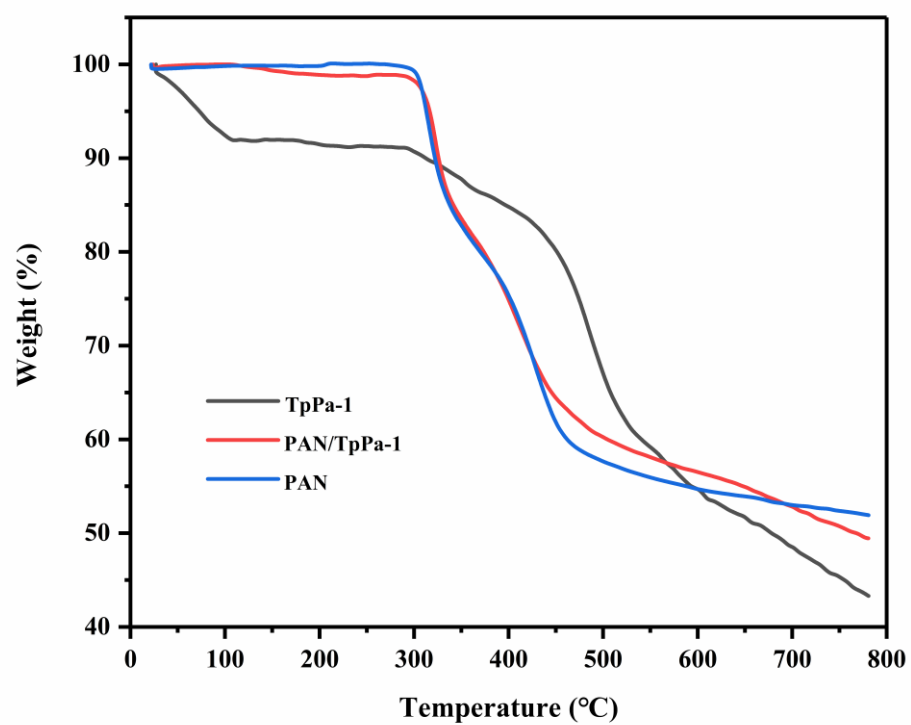

**Figure S4.** TGA results of TpPa-1, PAN and PAN/TpPa-1 electrospun nanofiber.

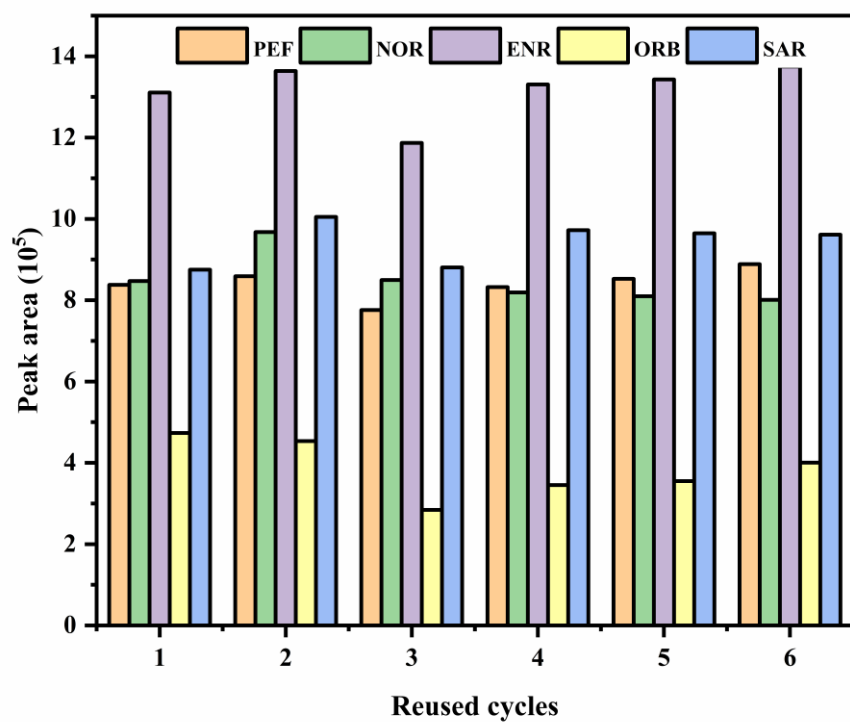

**Figure S5.** Reusability of PAN/TpPa-1 nanofiber.
